# Supplementary material for: ERG deregulation induces IGF-1R expression in prostate cancer cells and affects sensitivity to anti-IGF-1R agents
Source: PubMed Central journal article supplement (PMC4599293; doi:10.18632/oncotarget.3425), 2015-03-27
Supplement: oncotarget-06-16611-s001.pdf [file oncotarget-06-16611-s001.pdf]

## SUPPLEMENTARY FIGURE

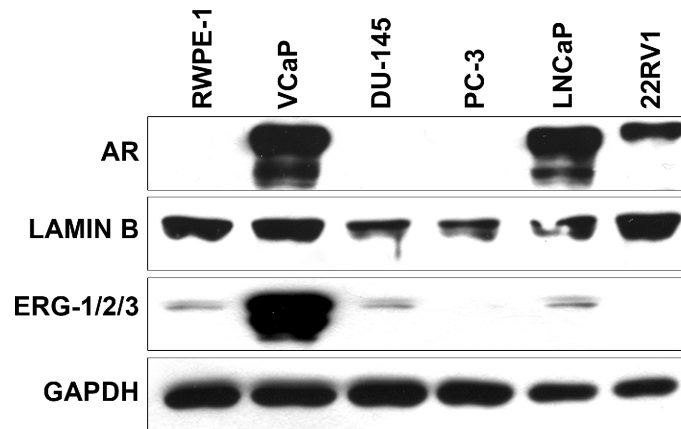

**Supplementary Figure S1: Protein expression levels of androgen receptor (AR) and ERG-1/2/3 in prostate cell lines.** Blots are representative of two independent experiments. LAMIN B or GAPDH were used as normalization.
